# Supplementary material for: Marine Omega‐3 Supplementation and Cardiovascular Disease: An Updated Meta‐Analysis of 13 Randomized Controlled Trials Involving 127 477 Participants
Source: PubMed Central journal article supplement — J Am Heart Assoc. 2019 Sep 30;8(19):e013543. doi: 10.1161/JAHA.119.013543 (PMC6806028; doi:10.1161/jaha.119.013543), 2019-09-30
Supplement: JAH3-8-e013543-s001.pdf [file JAH3-8-e013543-s001.pdf]

# **SUPPLEMENTAL MATERIAL**

**Figure S1. Dose-response relationship between marine omega-3 supplementation and risk of coronary heart disease endpoints.**

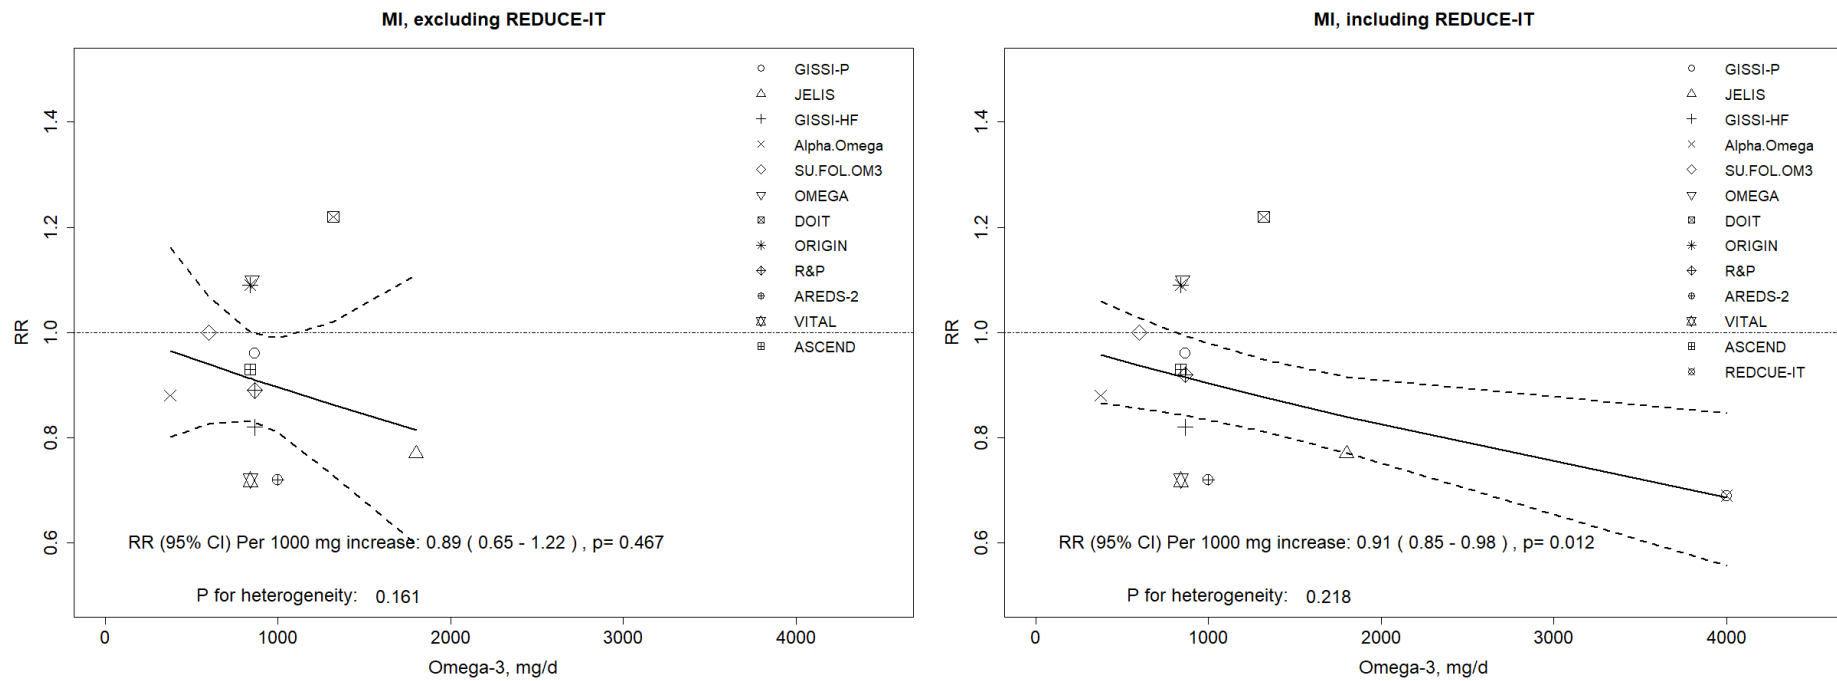

Panel A: Dose-response relationship between marine omega-3 supplementation and risk of myocardial infarction, which includes fatal and/or nonfatal MI.

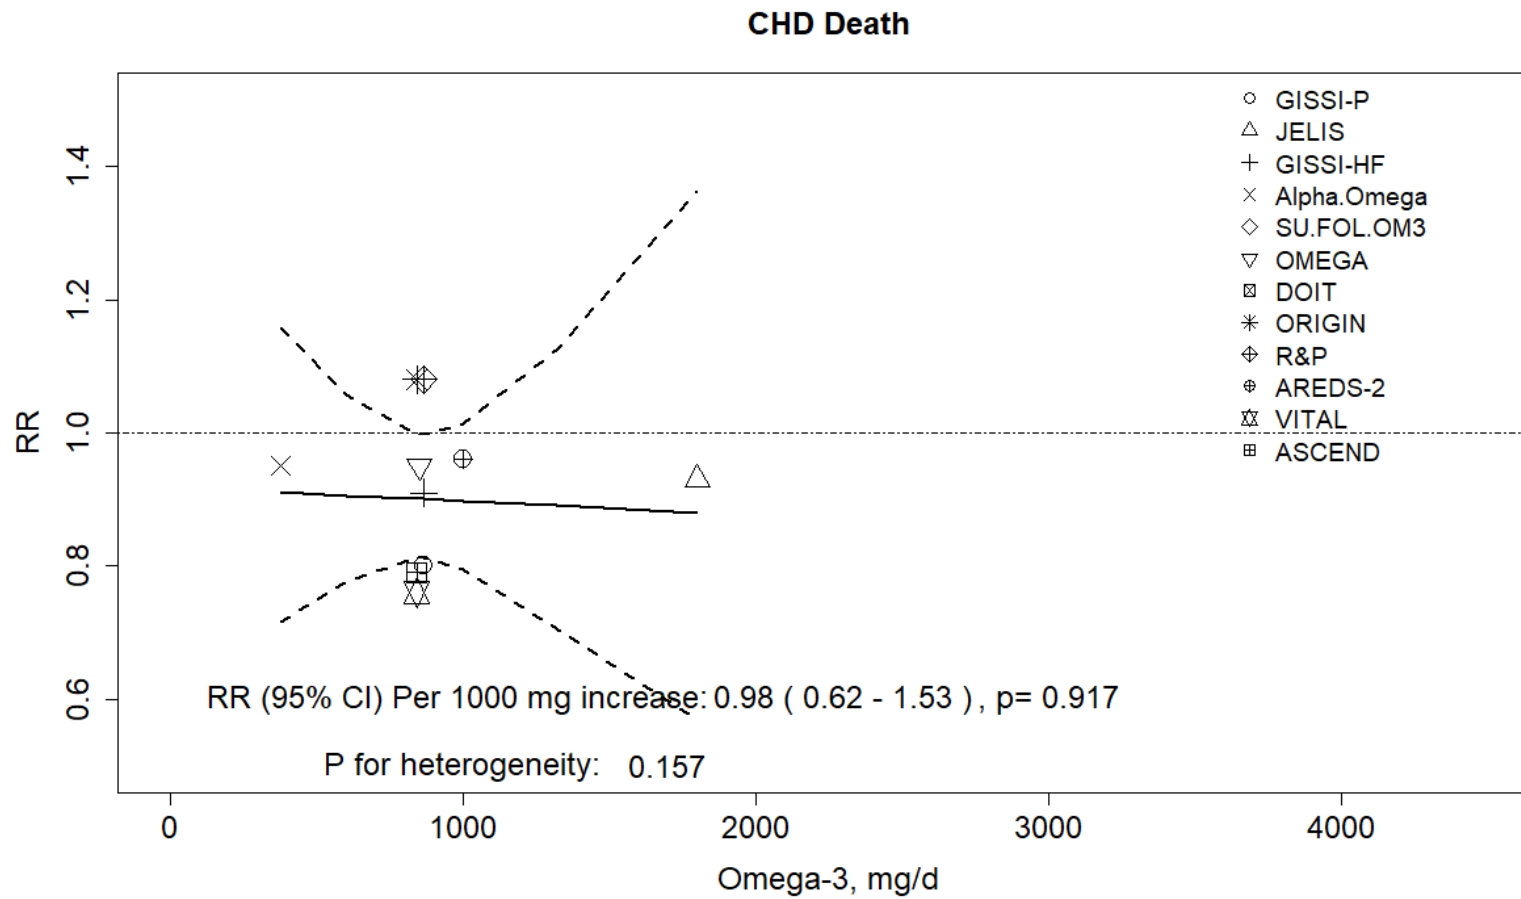

Panel B: Dose-response relationship between marine omega-3 supplementation and risk of CHD death.

Data not available in REDUCE-IT.

The RRs for SU.FOL.OM3 and DOIT were 0.41 and 0.39 which were too small to be captured in the figure.

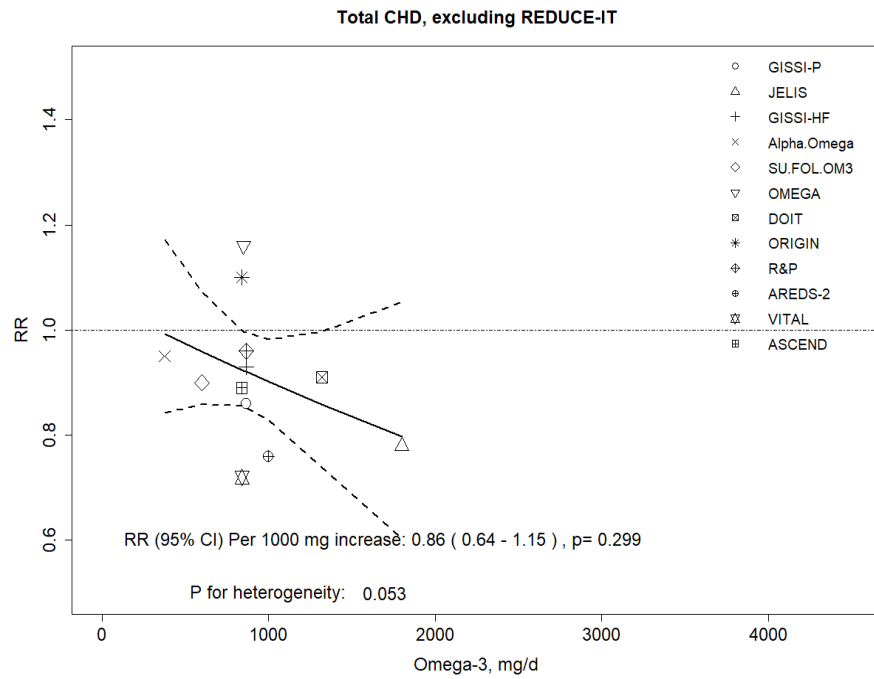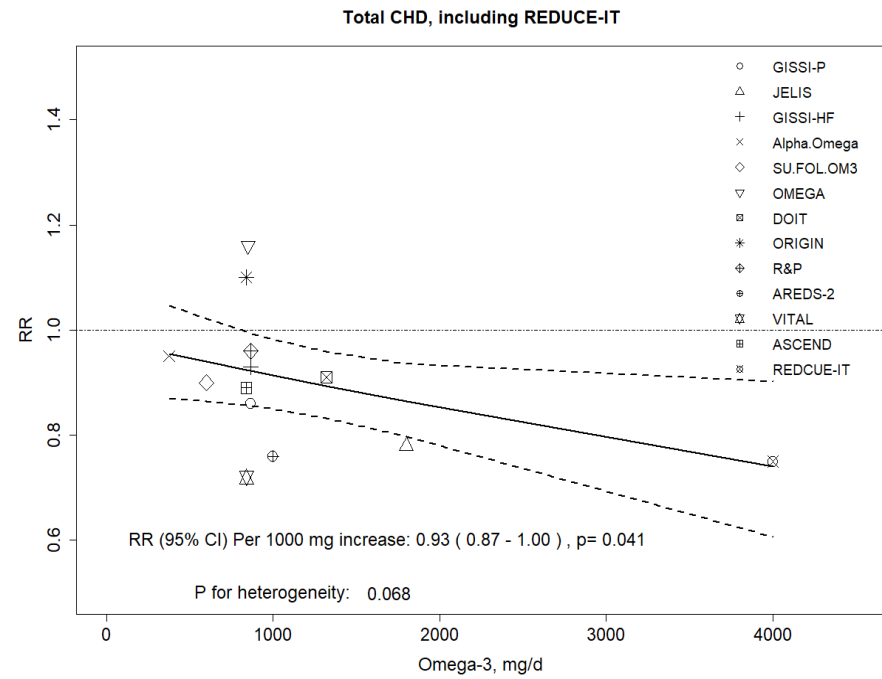

Panel C: Dose-response relationship between marine omega-3 supplementation and risk of total CHD, which includes MI, death from CHD, or coronary revascularization.

**Figure S2. Dose-response relationships between marine omega-3 supplementation and risk of other CVD subtypes.**

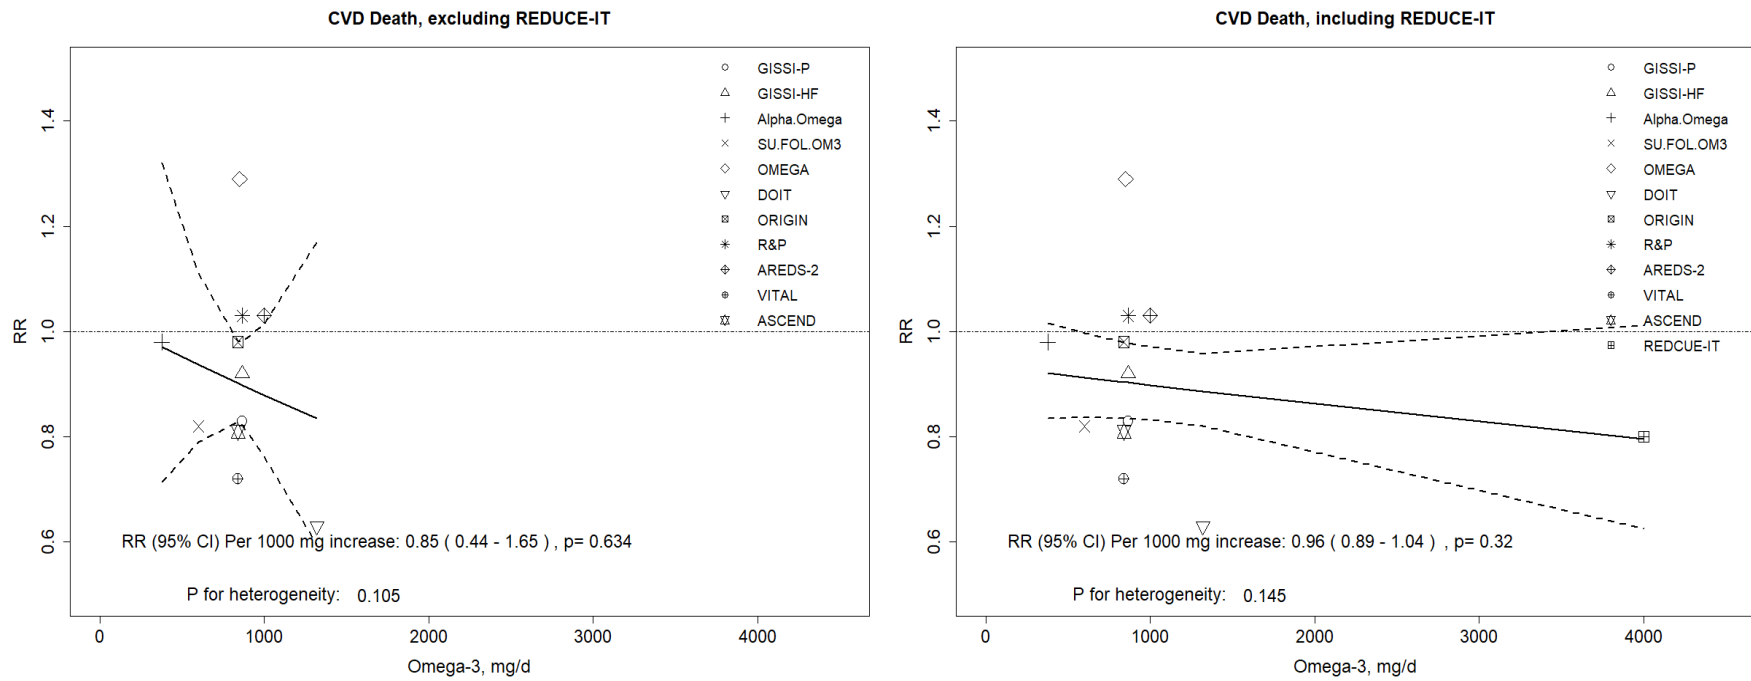

**Panel A: Dose-response relationship between marine omega-3 supplementation and risk of CVD death.**

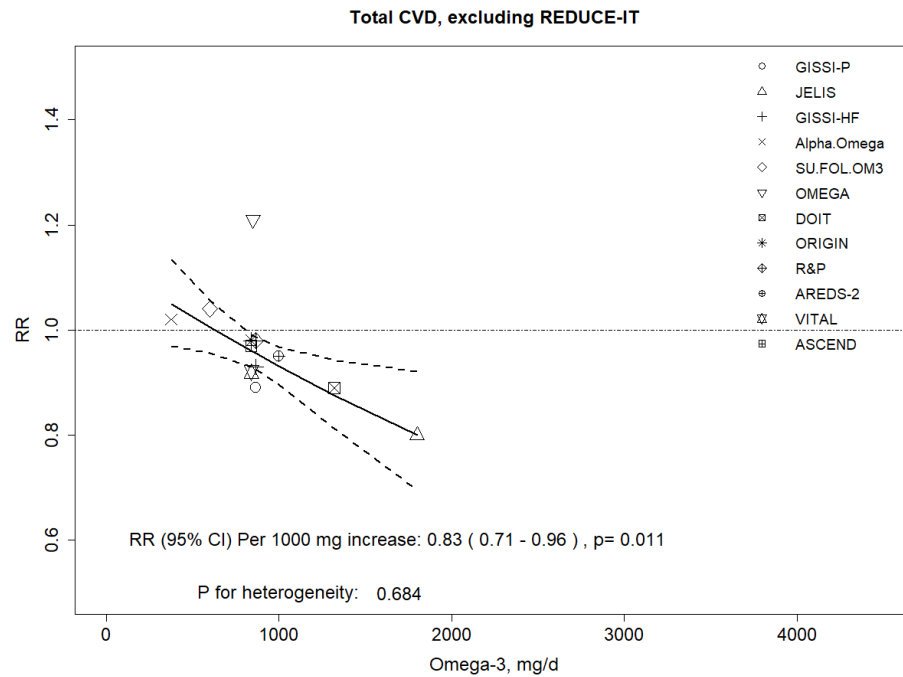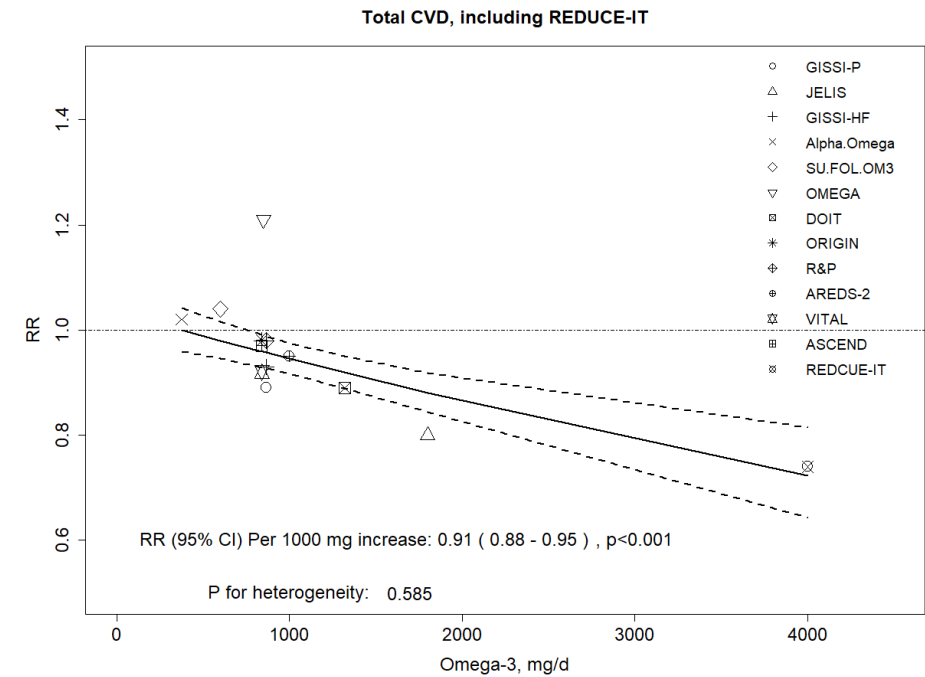

Panel B: Dose-response relationship between marine omega-3 supplementation and risk of total CVD, which includes nonfatal MI, nonfatal stroke, death from CVD, or hospitalization due to a cardiovascular cause (except for JELIS and ALPHA Omega which include revascularization).

Removing JELIS and ALPHA OMEGA resulted in RR (95% CI) per 1,000 mg/d increase 0.75 (0.47, 1.18), p=0.207 without including REDUCE-IT, and 0.92 (0.88, 0.96), p<0.001 with REDUCE-IT.

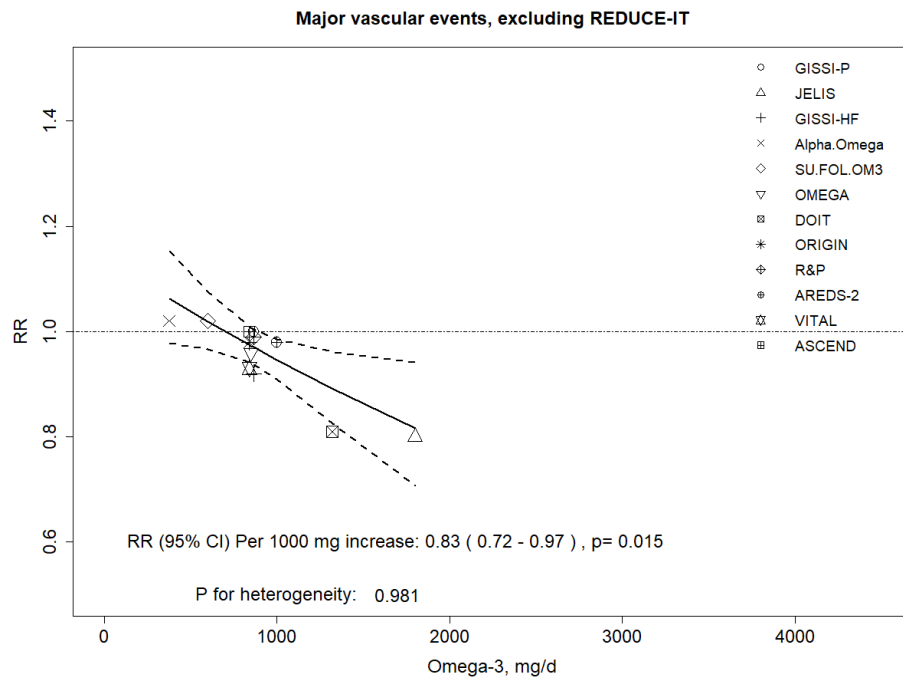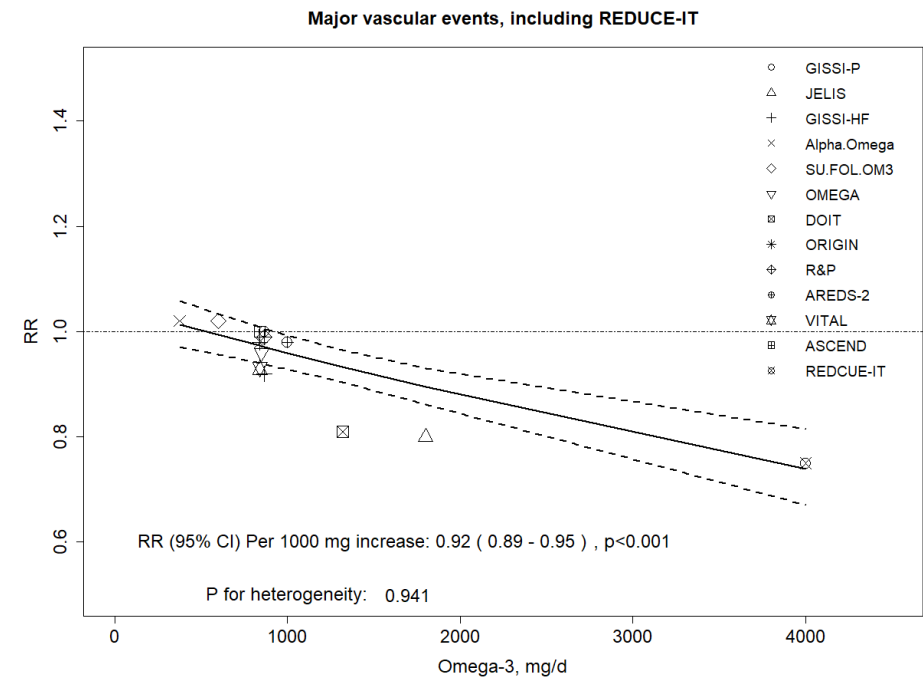

Panel C: Dose-response relationship between marine omega-3 supplementation and risk of major vascular events, which include nonfatal MI, nonfatal stroke, death from CVD, or revascularization.

**Figure S3. Dose-response relationship between marine omega-3 supplementation and risk of stroke.**

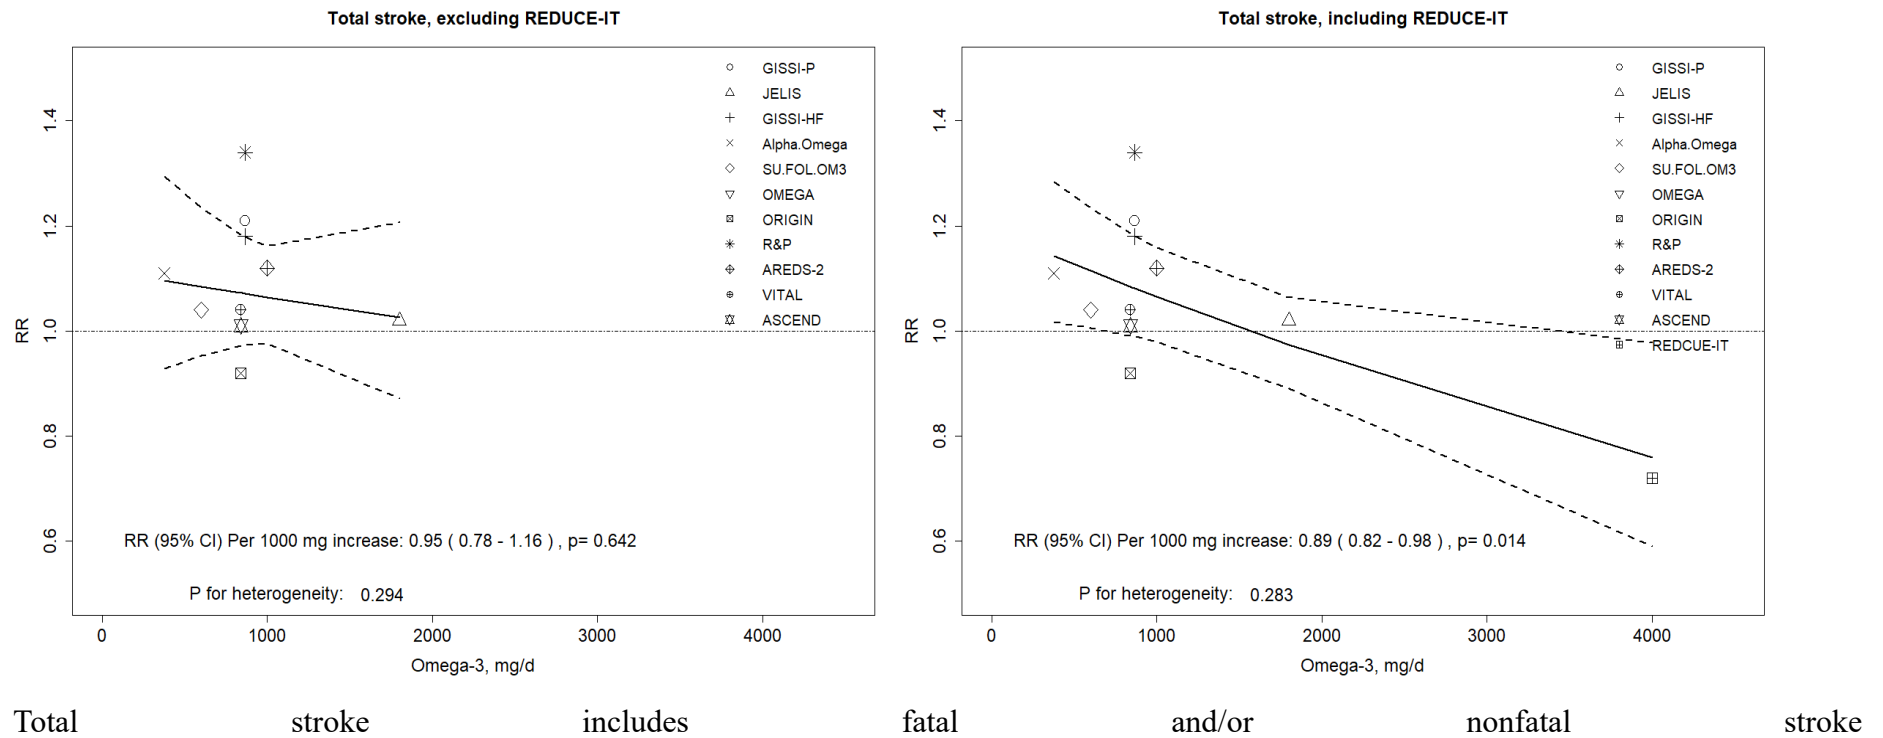



**Figure S4. Pooled associations between marine omega-3 supplementation and risk of cardiovascular disease endpoints excluding DOIT, SU.FOL.OM3, Alpha.Omega, and OMEGA due to lower dose, shorter follow-up duration, or smaller sample size than the rest of included studies.**

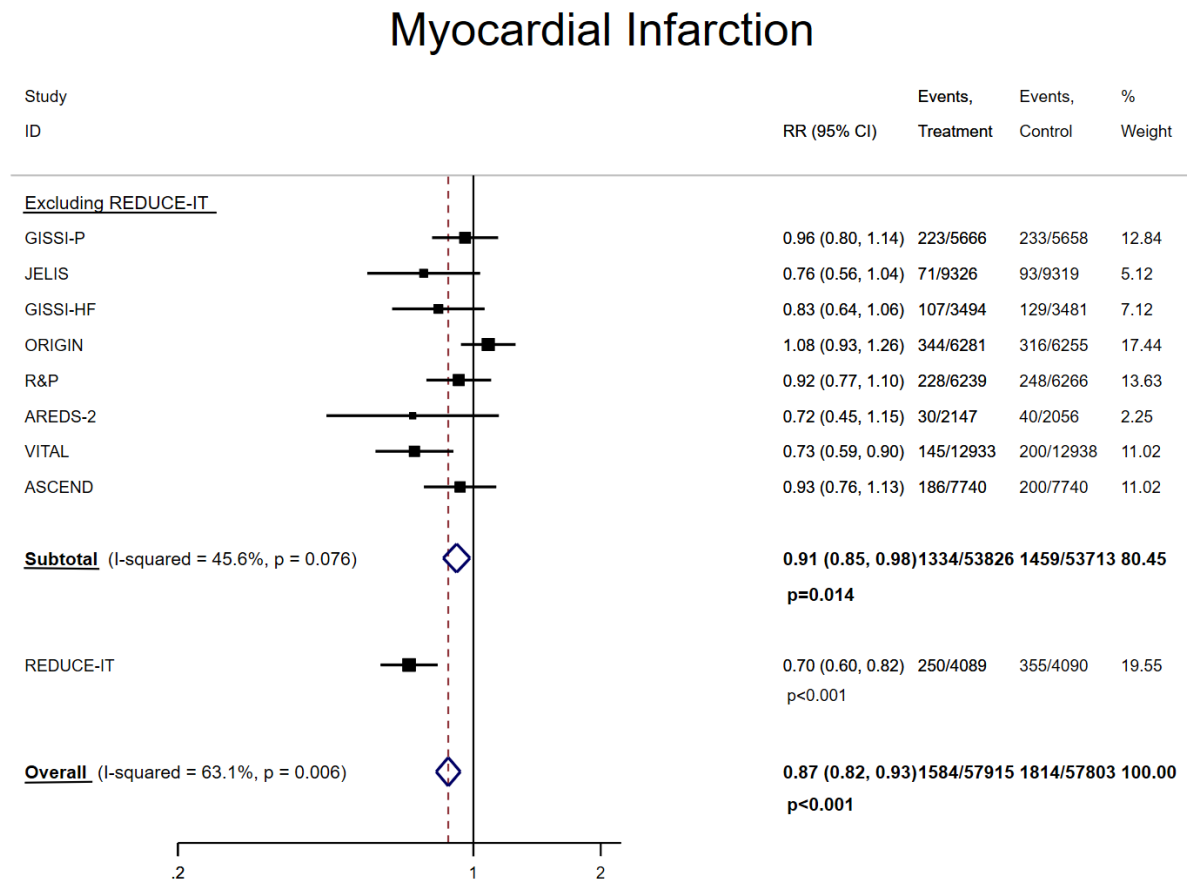

Panel A: Marine omega-3 supplementation and risk of myocardial infarction, which includes fatal and/or nonfatal MI.

# CHD Death

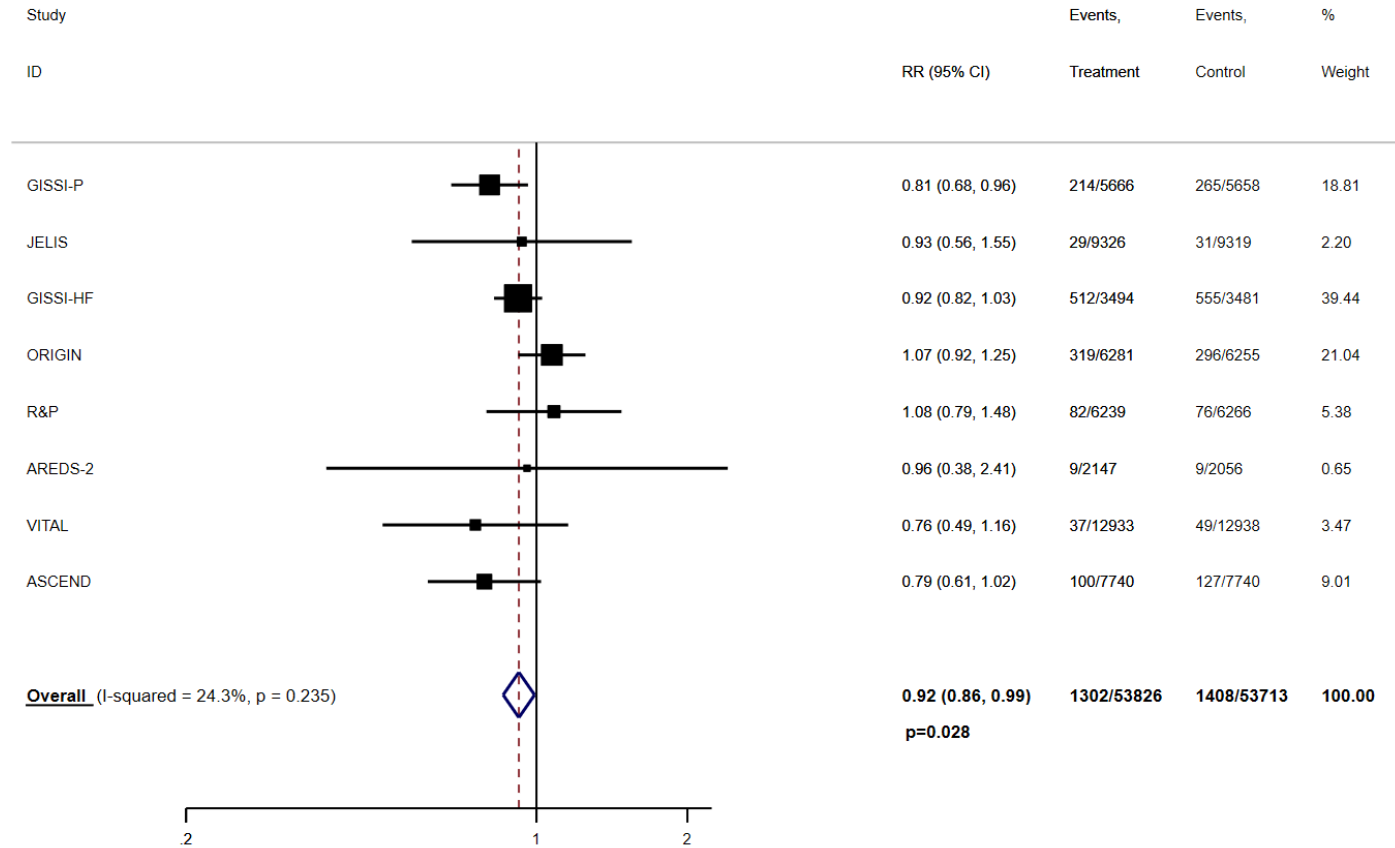

Panel B: Marine omega-3 supplementation and risk of CHD death.

## Total CHD

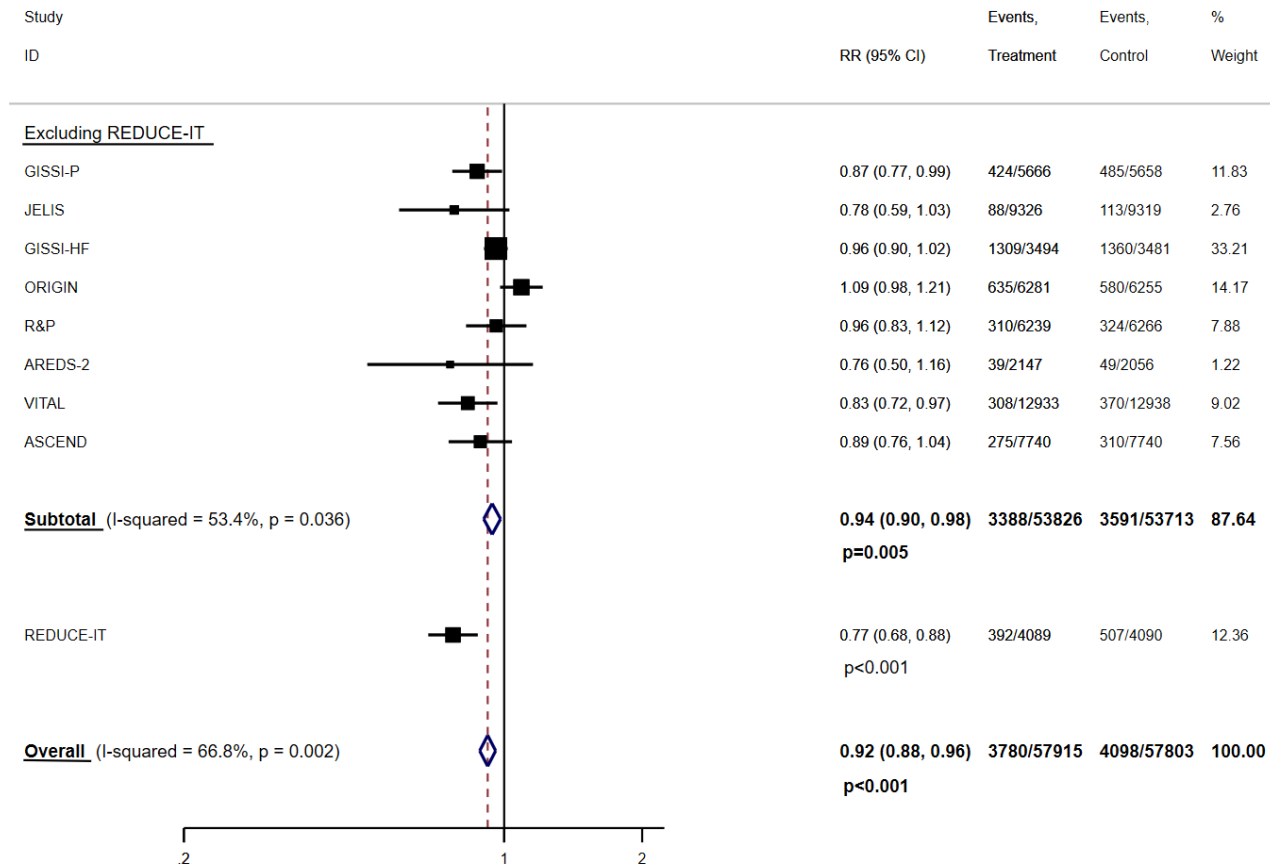

Panel C: Marine omega-3 supplementation and risk of total CHD, which includes MI, death from CHD, or coronary revascularization.

## Total stroke

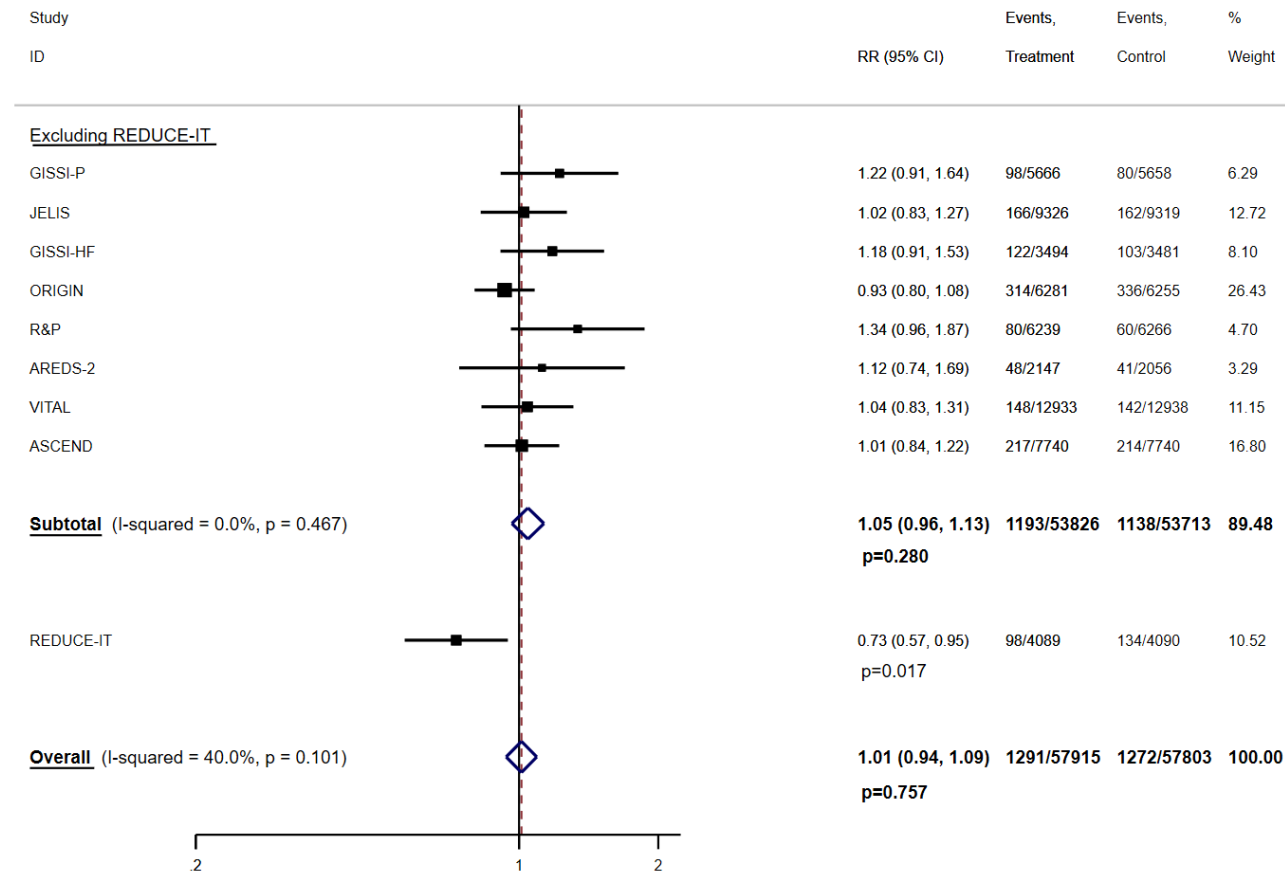

Panel D: Marine omega-3 supplementation and risk of total stroke, which includes fatal and/or nonfatal stroke.

# CVD Death

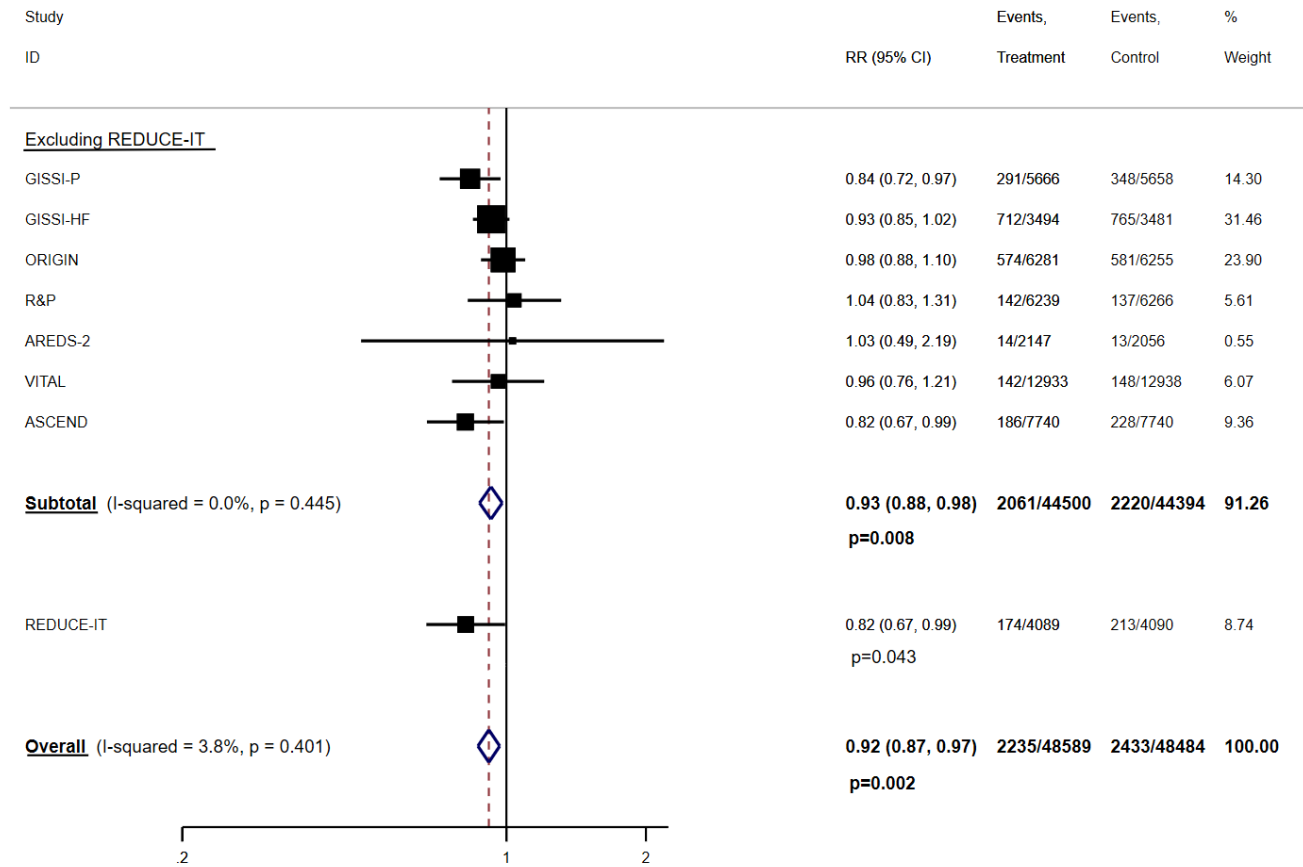

Panel E: Marine omega-3 supplementation and risk of CVD death.

## Total CVD

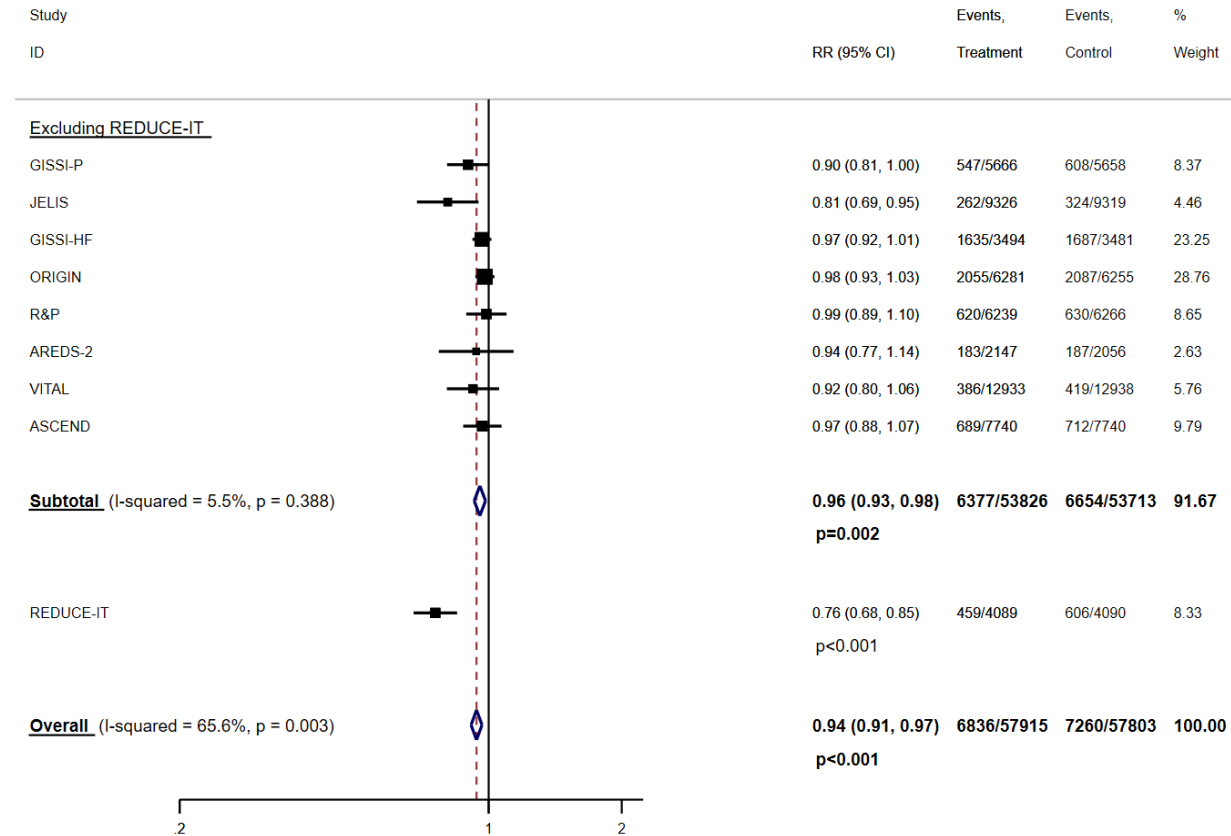

Panel F: Marine omega-3 supplementation and risk of total CVD, which includes nonfatal MI, nonfatal stroke, death from CVD, or hospitalization due to a cardiovascular cause (except for JELIS and ALPHA Omega which include revascularization).

## Major vascular events

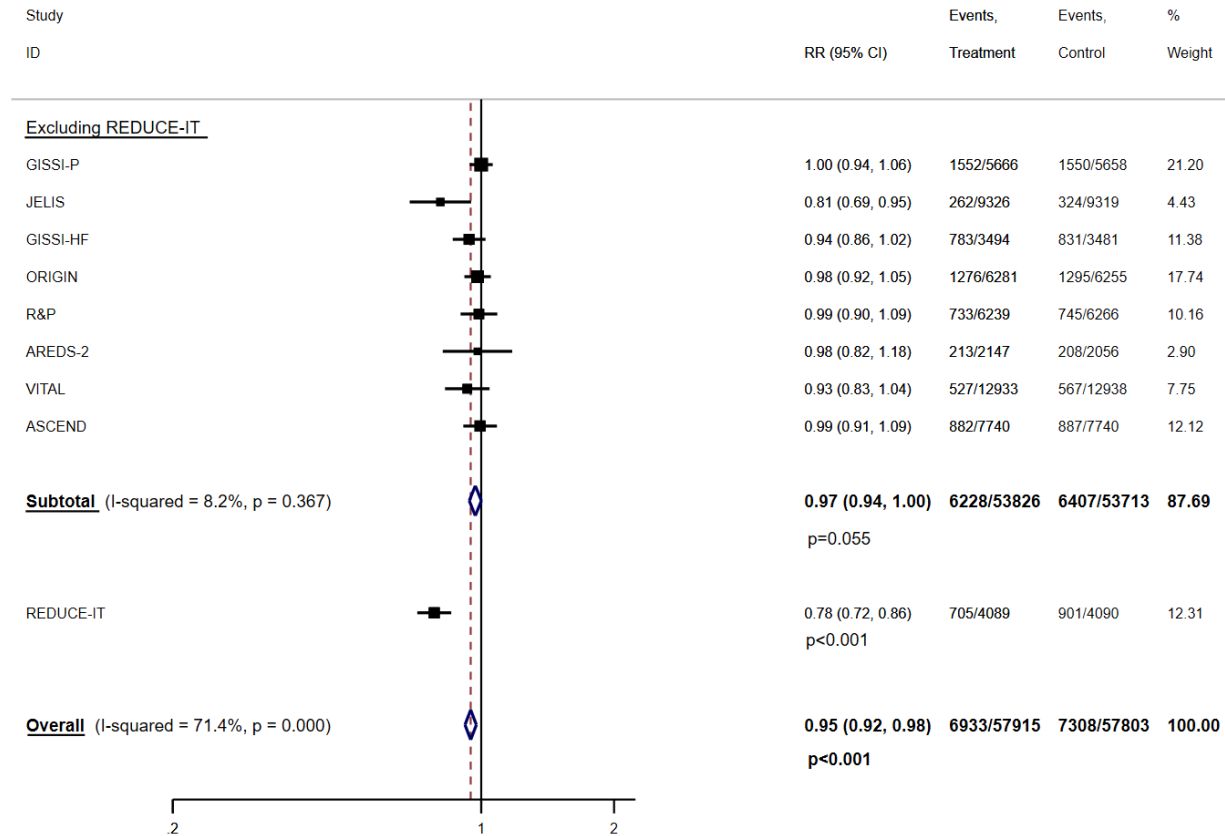

Panel G: Marine omega-3 supplementation and risk of major vascular events, which include nonfatal MI, nonfatal stroke, death from CVD, or revascularization.

**Figure S5. Pooled associations between marine omega-3 supplementation and risk of cardiovascular disease endpoints excluding two open-label trials, GISSI-P and JELIS.**

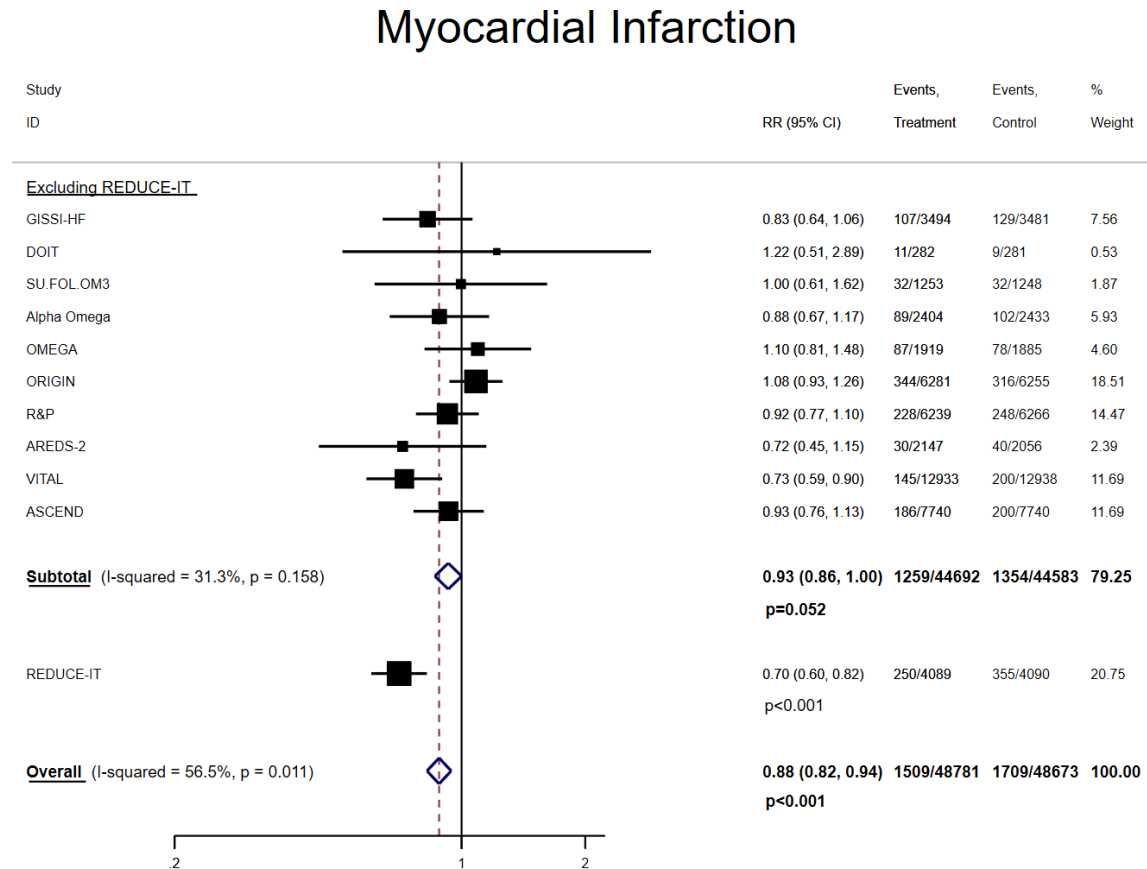

Panel A: Marine omega-3 supplementation and risk of myocardial infarction, which includes fatal and/or nonfatal MI.



# CHD Death

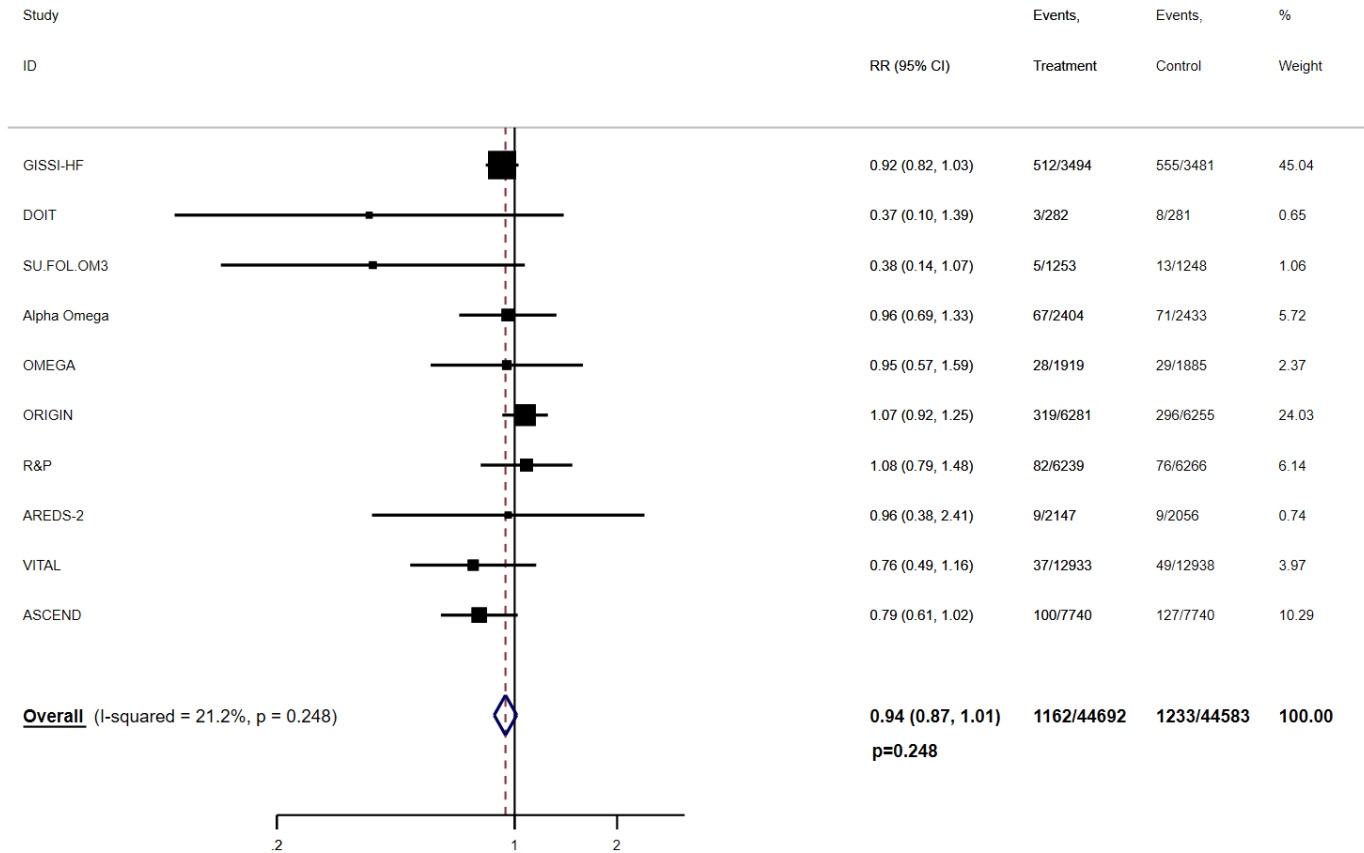

Panel B: Marine omega-3 supplementation and risk of CHD death.

# Total CHD

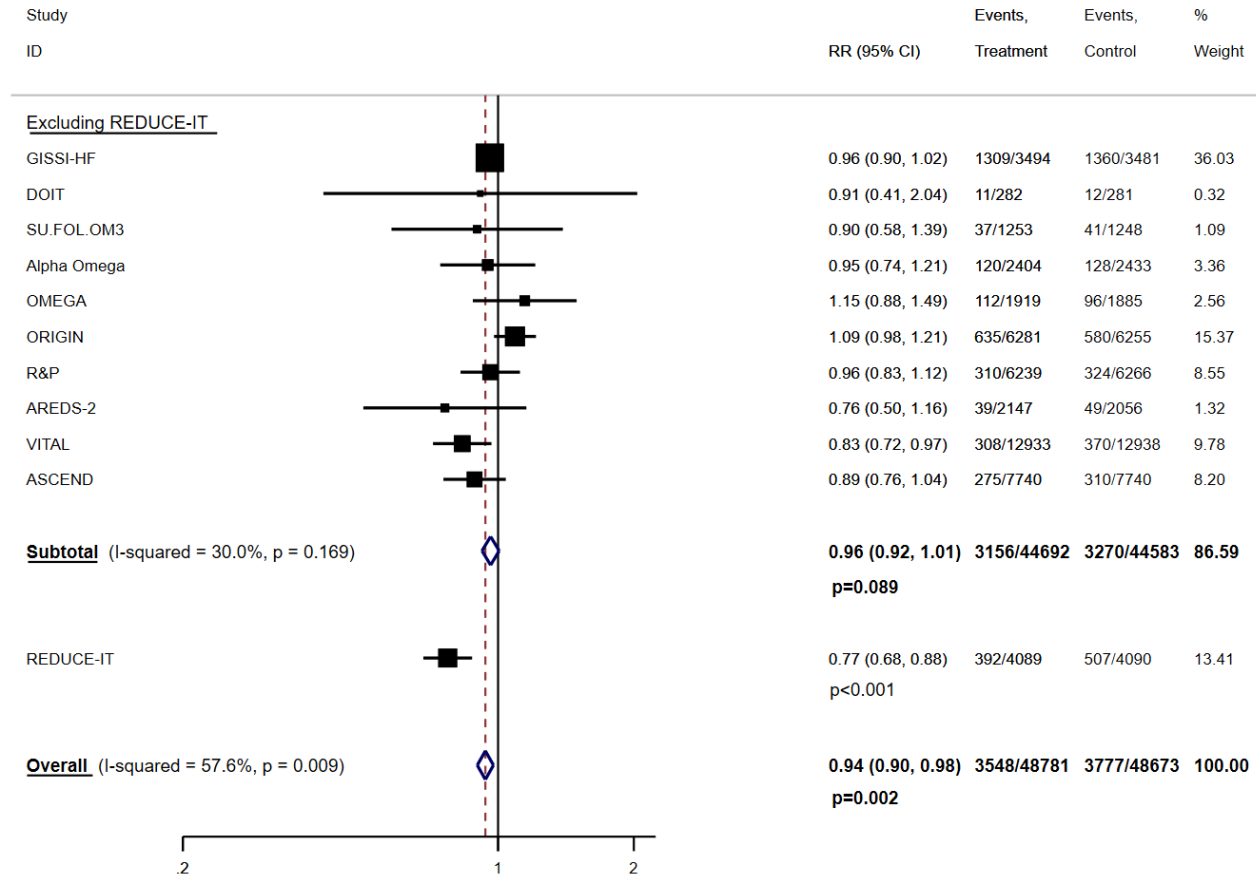

Panel C: Marine omega-3 supplementation and risk of total CHD, which includes MI, death from CHD, or coronary revascularization.

## Total stroke

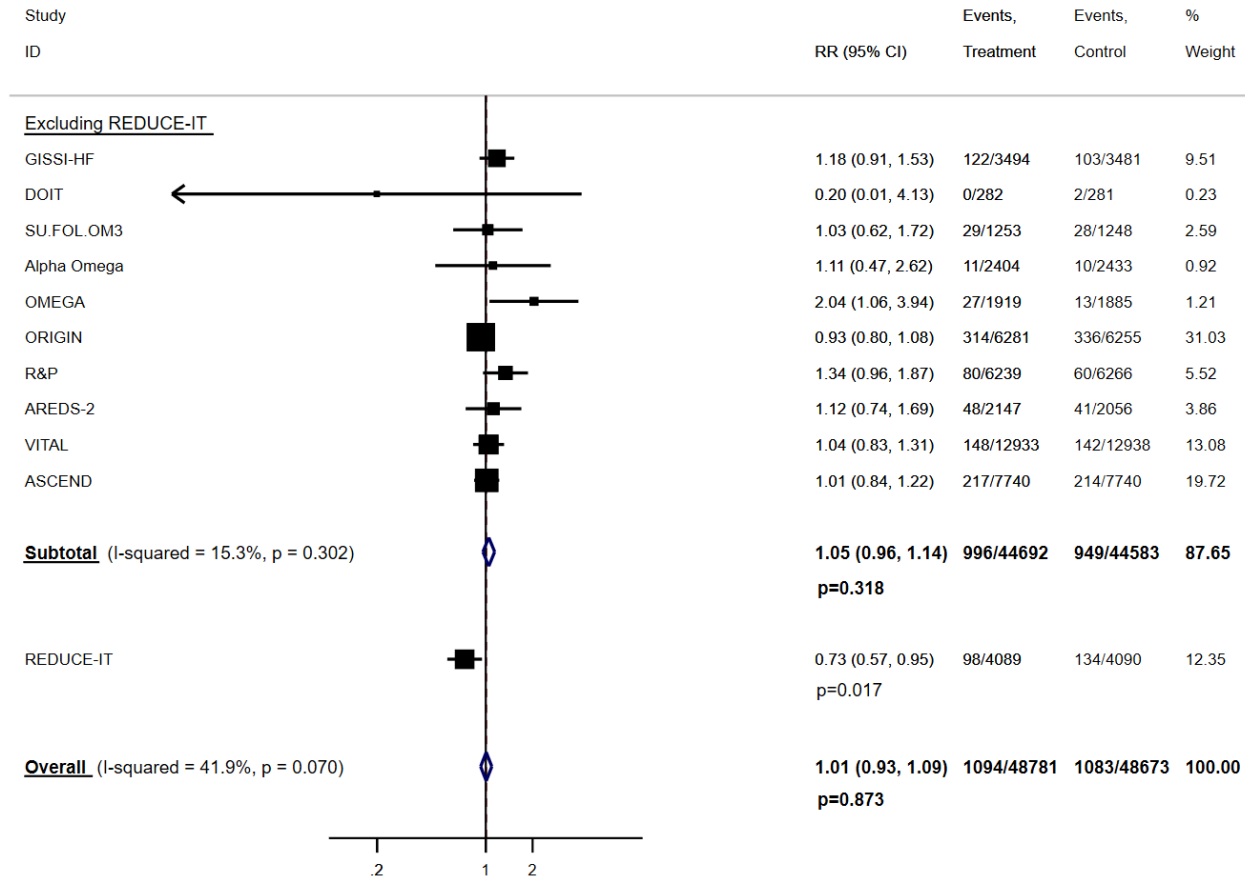

Panel D: Marine omega-3 supplementation and risk of total stroke, which includes fatal and/or nonfatal stroke.

# CVD Death

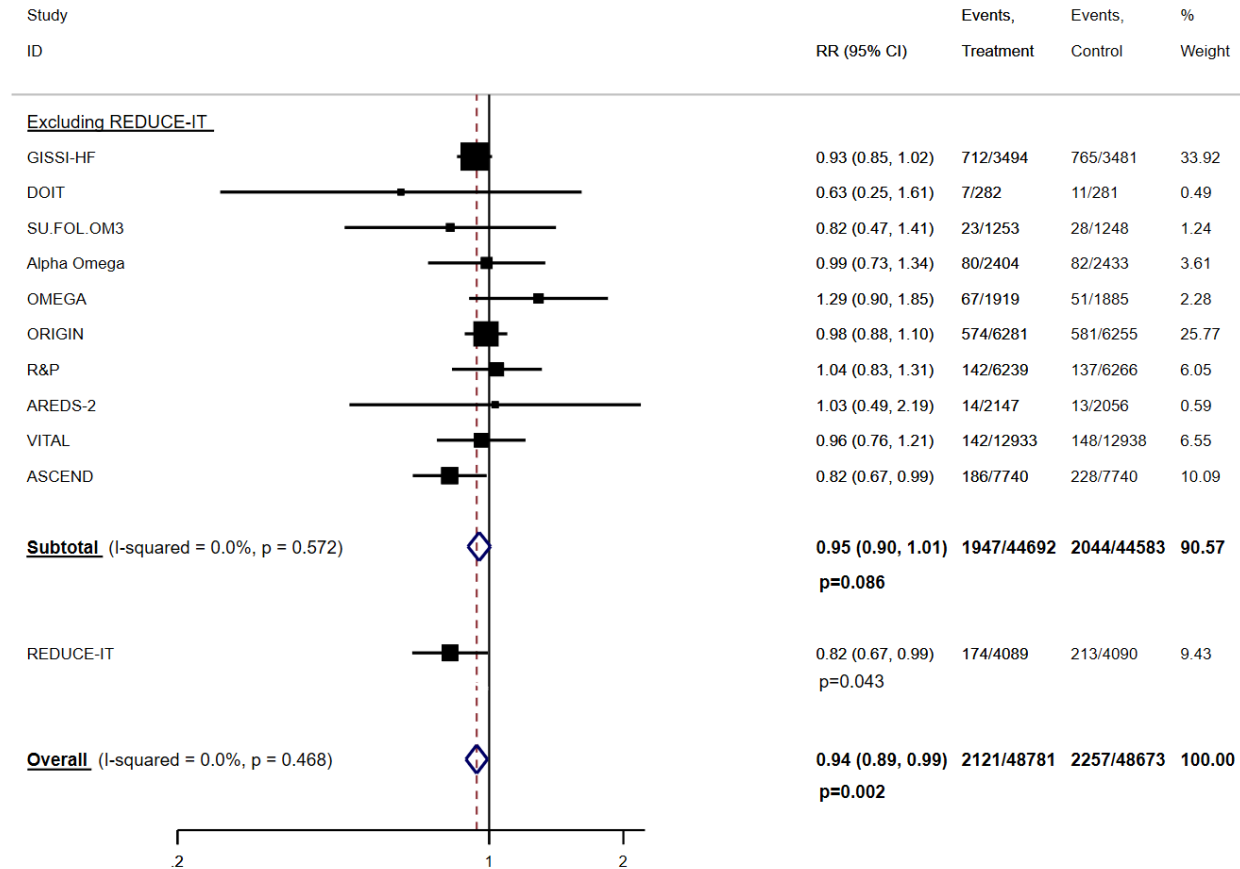

Panel E: Marine omega-3 supplementation and risk of CVD death.

## Total CVD

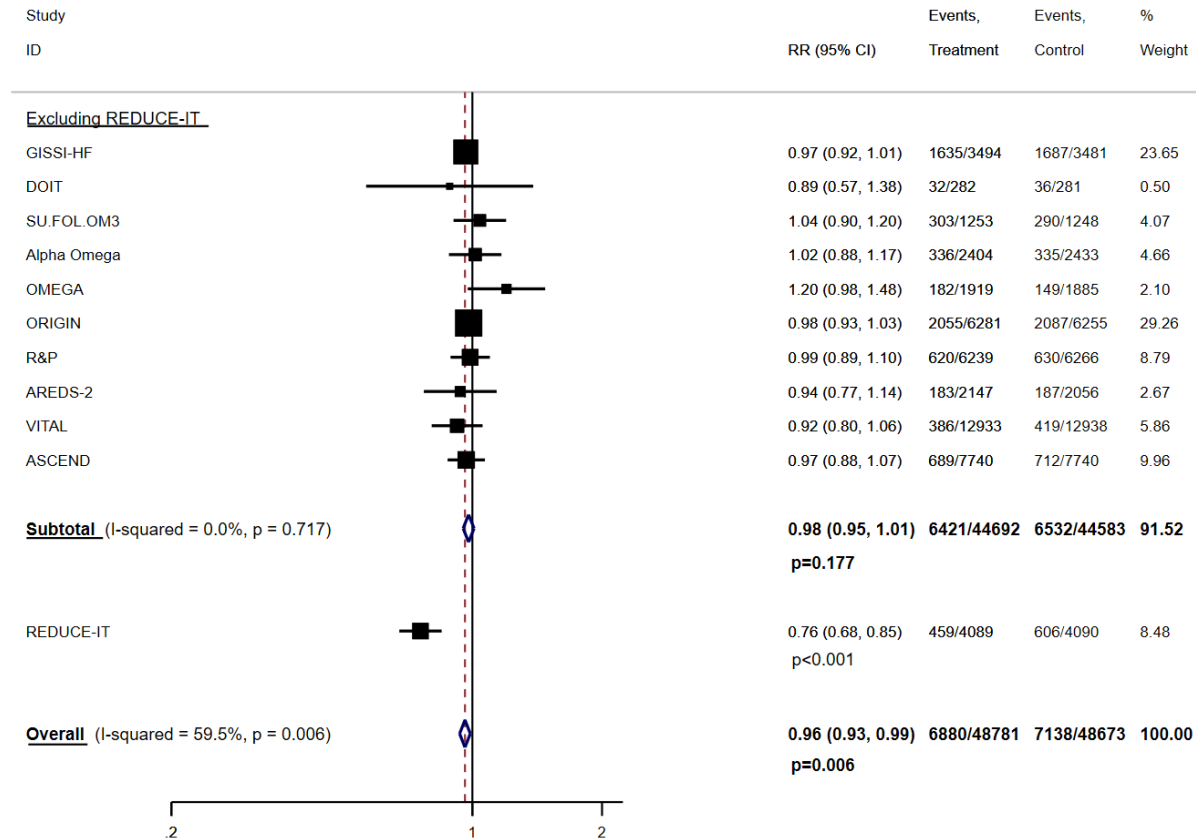

Panel F: Marine omega-3 supplementation and risk of total CVD, which includes nonfatal MI, nonfatal stroke, death from CVD, or hospitalization due to a cardiovascular cause (except for JELIS and ALPHA Omega which include revascularization).

## Major vascular events

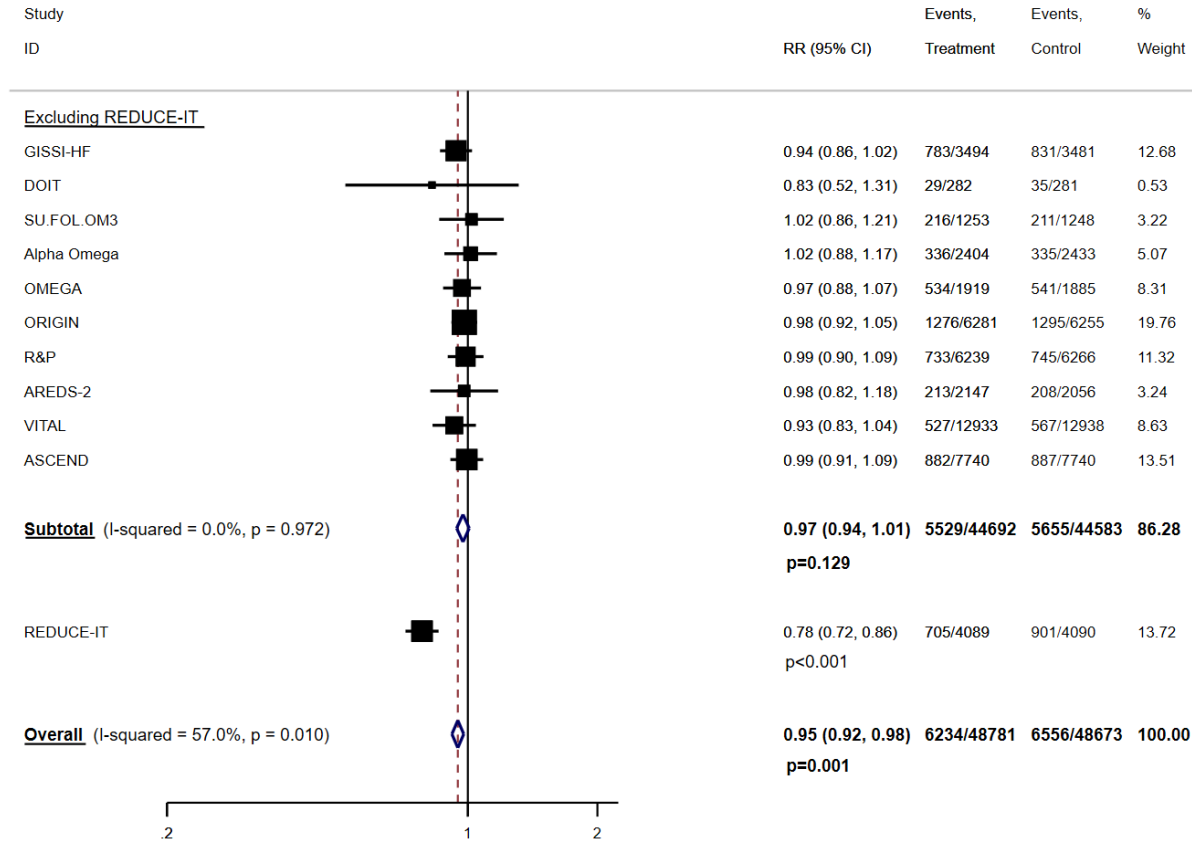

Panel G: Marine omega-3 supplementation and risk of major vascular events, which include nonfatal MI, nonfatal stroke, death from CVD, or revascularization.

**Table S1. Sensitivity analysis that excluded open-label trials and trials with smaller sample size, lower dose, and shorter follow-up duration.**

| Endpoints             | Main analysis (n=13 trials)* |                     | Sensitivity analysis (n=7 trials)† |                     |
|-----------------------|------------------------------|---------------------|------------------------------------|---------------------|
|                       | Excluding REDUCE-IT          | Including REDUCE-IT | Excluding REDUCE-IT                | Including REDUCE-IT |
| Myocardial infarction | 0.92 (0.86, 0.99)            | 0.88 (0.83, 0.94)   | 0.92 (0.84, 0.99)                  | 0.87 (0.80, 0.93)   |
| CHD death             | 0.91 (0.85, 0.98)            | NA                  | 0.95 (0.88, 1.03)                  | NA                  |
| Total CHD             | 0.95 (0.91, 0.99)            | 0.93 (0.89, 0.96)   | 0.96 (0.92, 1.00)                  | 0.93 (0.89, 0.97)   |
| Total stroke          | 1.05 (0.98, 1.14)            | 1.02 (0.95, 1.10)   | 1.03 (0.94, 1.13)                  | 0.99 (0.91, 1.08)   |
| CVD death             | 0.93 (0.88, 0.99)            | 0.92 (0.88, 0.97)   | 0.94 (0.89, 1.00)                  | 0.93 (0.88, 0.99)   |
| Total CVD             | 0.97 (0.94, 0.99)            | 0.95 (0.92, 0.98)   | 0.97 (0.94, 1.00)                  | 0.95 (0.92, 0.98)   |
| Major vascular events | 0.97 (0.94, 1.00)            | 0.95 (0.93, 0.98)   | 0.97 (0.93, 1.01)                  | 0.94 (0.91, 0.97)   |

\* n referred to the number of included studies.

† DOIT, SU.FOL.OM3, Alpha.Omega, OMEGA, GISSI-P, and JELIS are excluded.
